# Supplementary material
Source: PubMed Central journal article supplement (PMC2683590)
Supplement: NIHMS39455-supplement-1.pdf [file NIHMS39455-supplement-1.pdf]

**Supplementary Table 1: PCR primers for generating *in situ* probes**

| Primer Name                | Sequence (5' – 3')*   | Primer Name               | Sequence (5' – 3')*   |
|----------------------------|-----------------------|---------------------------|-----------------------|
| fa08c02.fw. <u>Sp6</u>     | TGCTTGCTTGCTTTCCTTGG  | fq35g11.fw. <u>Sp6</u>    | AAAGCCTGTTGTTCTGGTCC  |
| fa08c02.rv. <u>T7</u>      | AAAACCAGATAGGCCGACTC  | fq35g11.rv. <u>T7</u>     | GGTGAACAGATCTGTGGTAG  |
| fb94e02.fw. <u>Sp6</u>     | CCAGCATCCCCCATGTGAAGG | fu20d03.fw. <u>Sp6</u>    | ATAAGGAGCACGCATACAGG  |
| fb94e02.rv. <u>T7</u>      | GCACGGATAGGACTGCTCTGC | fu20d03.rv. <u>T7</u>     | AGACCCAGTGGAAGTGAATG  |
| fc21a11.fw. <u>Sp6</u>     | GGAGCTTTGACGACGCACCAG | Rnd3a.fw. <u>Sp6</u>      | GTCCCTCAGCCCCGGAATGG  |
| fc21a11.rv. <u>T7</u>      | TGCTGCCTCATGTGGACCTGC | Rnd3a.rv. <u>T7</u>       | GGTCTGTTGCCACAGCAGCG  |
| fc25c04.fw. <u>Sp6</u>     | CCTCACAGACAACCAGGCGG  | zgc:55473.fw. <u>Sp6</u>  | ACTCCCTCAACTGGATGGCC  |
| fc25c04.rv. <u>T7</u>      | TCCACAAGCGCAGACGCAGC  | zgc:55473.rv. <u>T7</u>   | TGGCCACCAGAACCTCTCTG  |
| fd60d05.fw. <u>Sp6</u>     | TTGAGGGTGTTGTGGTGCCG  | zgc:63595.fw. <u>Sp6</u>  | CCCTCAGCGGGATCTATCAG  |
| fd60d05.rv. <u>T7</u>      | CTGGTACAGCACCTCCAGAG  | zgc:63595.rv. <u>T7</u>   | GAGACAGGTAGGAGCAGAGC  |
| fi31a01.fw. <u>Sp6</u>     | GATCTTCCCCTTCCAGTGGC  | zgc:63838.fw. <u>Sp6</u>  | TGGCCCTGCAGAGAAGGGAG  |
| fi31a01.rv. <u>T7</u>      | TCCATCAGCCTGGTGTCTCT  | zgc:63838.rv. <u>T7</u>   | AGCTGCCTGGCACATCTGCC  |
| fi38h08.fw. <u>Sp6</u>     | ACTCCCAGGACAGCAGAGAG  | zgc:73231.fw. <u>Sp6</u>  | TGCCCCAAAGACTG        |
| fi38h08.rv. <u>T7</u>      | TCCCTTACAGGCTTGGCAG   | zgc:73231.rv. <u>T7</u>   | GGTGGGCTGGATGTT       |
| fl63.b12.x1.fw. <u>Sp6</u> | TGGATAAGAGGGTCTCACAGC | zgc:92484.fw. <u>Sp6</u>  | CCCGGAGCTTCAGGCCACAG  |
| fl63.b12.x1.rv. <u>T7</u>  | AGACAGTGTGCAAGAAGAGC  | zgc:92484.rv. <u>T7</u>   | TCCAGACAGATGCGGCCCGC  |
| fl63b12.y1.fw. <u>Sp6</u>  | TGAGCCACCTGTTGGGATGTC | zgc:92916.fw. <u>Sp6</u>  | GTTATACGGGAAGATGGCTGC |
| fl63b12.y1.rv. <u>T7</u>   | CCCTGCACAGCTAACTGTAGG | zgc:92916.rv. <u>T7</u>   | CCGCATACAAACAGGTCCAG  |
| fm69b04.fw. <u>Sp6</u>     | AACGTTGTTTTGGATGCACC  | zgc:136987.fw. <u>Sp6</u> | GTCGAGCGCTCTGGTTGTGTG |
| fm69b04.rv. <u>T7</u>      | GAGTGTGAATCATGACCTTC  | zgc:136987.rv. <u>T7</u>  | GCTTCAGCCAGTCCTCAGTC  |
| fo94g05.fw. <u>Sp6</u>     | CTGTTGGTGGAGCTGCAGGG  | zgc:153275.fw. <u>Sp6</u> | GGTTTGTGTGGGATCCCCGAG |
| fo94g05.rv. <u>T7</u>      | CTGCTGCCTGCCAGACACAG  | zgc:153275.rv. <u>T7</u>  | TCGCCGGATGATTCTCTCCCG |

\*forward primers contain the Sp6 polymerase recognition sequence (ATTTAGGTGACACTATAGAA) on the 5' end, while reverse primers contain the T7 polymerase recognition sequence (TAATACGACTCACTATAGGGA) on the 5' end to allow generation of mRNA *in situ* probes directly from the PCR products (polymerase recognition sequences not shown).
